# Supplementary material for: Conserved Active-Site Residues Associated with OAS Enzyme Activity and Ubiquitin-Like Domains Are Not Required for the Antiviral Activity of goOASL Protein against Avian Tembusu Virus
Source: MDPI journal article supplement (doi:10.3390/v10070371), 2018-07-15
Supplement: s1 [file s1]

## Supplementary Material:

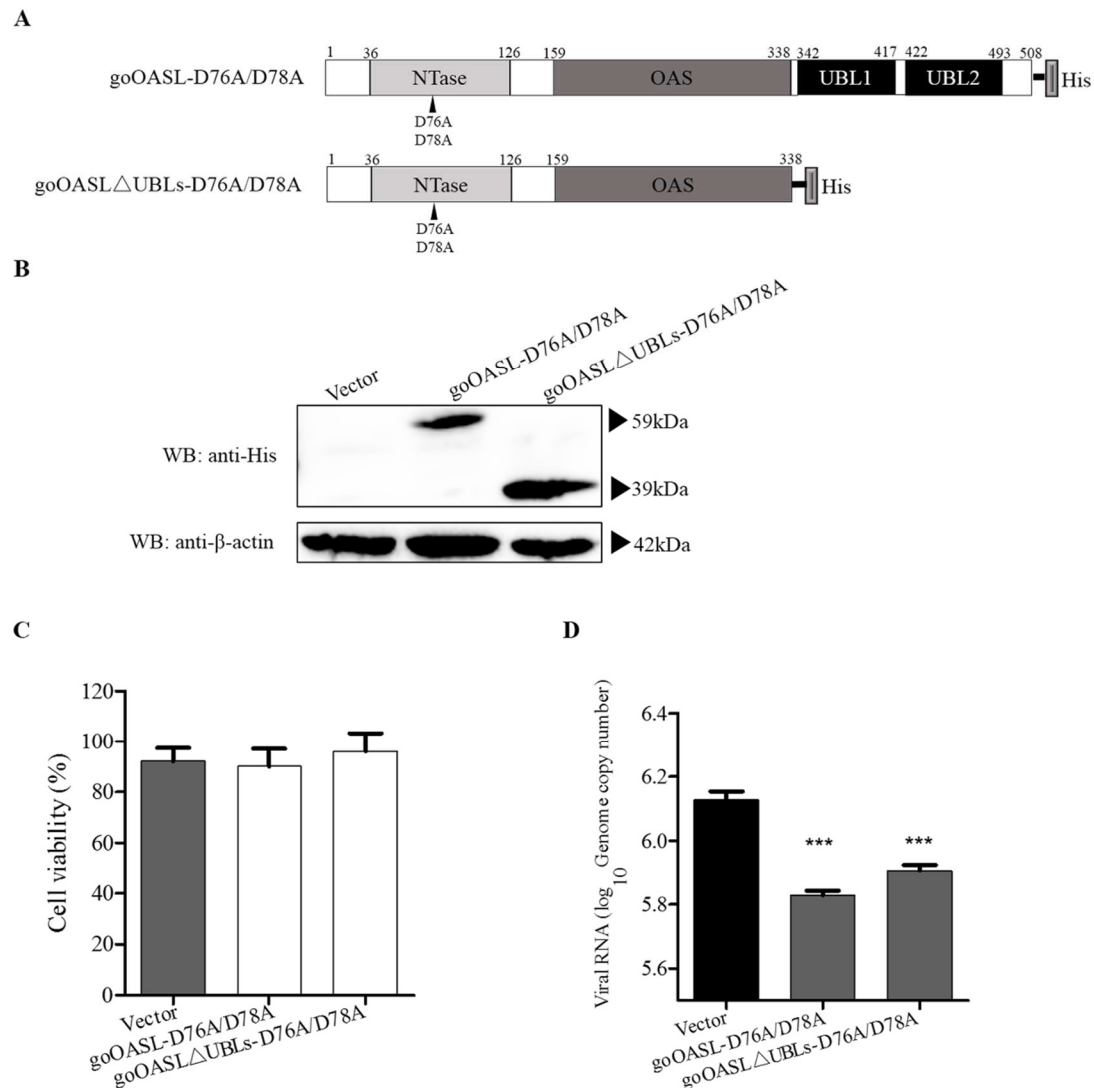

**Figure S1.** Construction of the eukaryotic expression plasmids of goOASL-mutant proteins and its antiviral activity against DTMUV in DEFs. (A) Schematic diagram of goOASL-D76A/D78A and goOASL $\Delta$ UBLs-D76A/D78A. (B) Overexpression of goOASL-D76A/D78A and goOASL $\Delta$ UBLs-D76A/D78A proteins in DEFs. DEFs seeded in a 12-well plate were transfected with goOASL-D76A/D78A and goOASL $\Delta$ UBLs-D76A/D78A (1.6  $\mu$ g/well), respectively. At 24 h after transfection, the cells were harvested using RIPA buffer for western blotting analysis. (C) Detection of cytotoxicity of the goOASL-D76A/D78A and goOASL $\Delta$ UBLs-D76A/D78A proteins in DEFs (D) The overexpression of the goOASL-D76A/D78A and goOASL $\Delta$ UBLs-D76A/D78A proteins inhibited the replication of DTMUV in DEFs. The

goOASL-D76A/D78A-overexpressing cells, goOASL $\Delta$ UBLs-D76A/D78A-overexpressing cells and control cells were infected with DTMUV (104 TCID<sub>50</sub>/well) at 24 h after transfection. At 24 h, the genome copy number of DTMUV was quantified via qRT-PCR. All data were analysed using the GraphPad Prism software and were represented as the means + SD (n = 3). Significance was determined using the unpaired two-tailed t-test (\*\*p<0.001).
